# Supplementary material for: Off-Label Use of Rituximab in Patients with Different Types of Nephropathies in a Tertiary Hospital: A Retrospective Study
Source: J Clin Med. 2021 Oct 26;10(21):4941. doi: 10.3390/jcm10214941 (PMC8584949; doi:10.3390/jcm10214941)
Supplement: Supplementary file 1 [file jcm-10-04941-s001.zip › jcm-1405795-supplementary.pdf]

**Table S1.** Observed patient outcomes for each type of nephropathy

| Type of GN              | MN ( <i>n</i> =30)     | MPGN ( <i>n</i> =12) | MCD ( <i>n</i> =15)    | FSGS ( <i>n</i> =3) | Other ( <i>n</i> =1) |
|-------------------------|------------------------|----------------------|------------------------|---------------------|----------------------|
| Always CR, <i>n</i> (%) | 7 (23.3%)              | 2 (16.7%)            | 10 (66.7%)             | 0                   | 0                    |
| Always PR, <i>n</i> (%) | 8 (26.7%)              | 4 (33.3%)            | 1 (6.7%)               | 0                   | 0                    |
| Always NR, <i>n</i> (%) | 8 (26.7%)              | 6 (50.0%)            | 2 (13.3%)              | 3 (100%)            | 1 (100%)             |
| Other, <i>n</i> (%)     | 7 (23.3%) <sup>a</sup> | 0                    | 2 (13.3%) <sup>b</sup> | 0                   | 0                    |

MN: membranous nephropathy. MPGN: membranoproliferative glomerulonephritis. MCD: minimal change disease. FSGS: focal segmental glomerulosclerosis. CR: complete response. PR: partial response. NR: no response.

<sup>a</sup> 6 patients presented a CR after the first cycle, but PR after subsequent cycles. 1 patient presented a PR after the first cycle but did not respond to the second cycle.

<sup>b</sup> 1 patient presented a PR after the first cycle, but a CR after the second, and 1 patient did not respond to the first cycle but presented a PR to the second.

**Figure S1.** Proteinuria levels before and after rituximab (RTX) treatment for each type of nephropathy

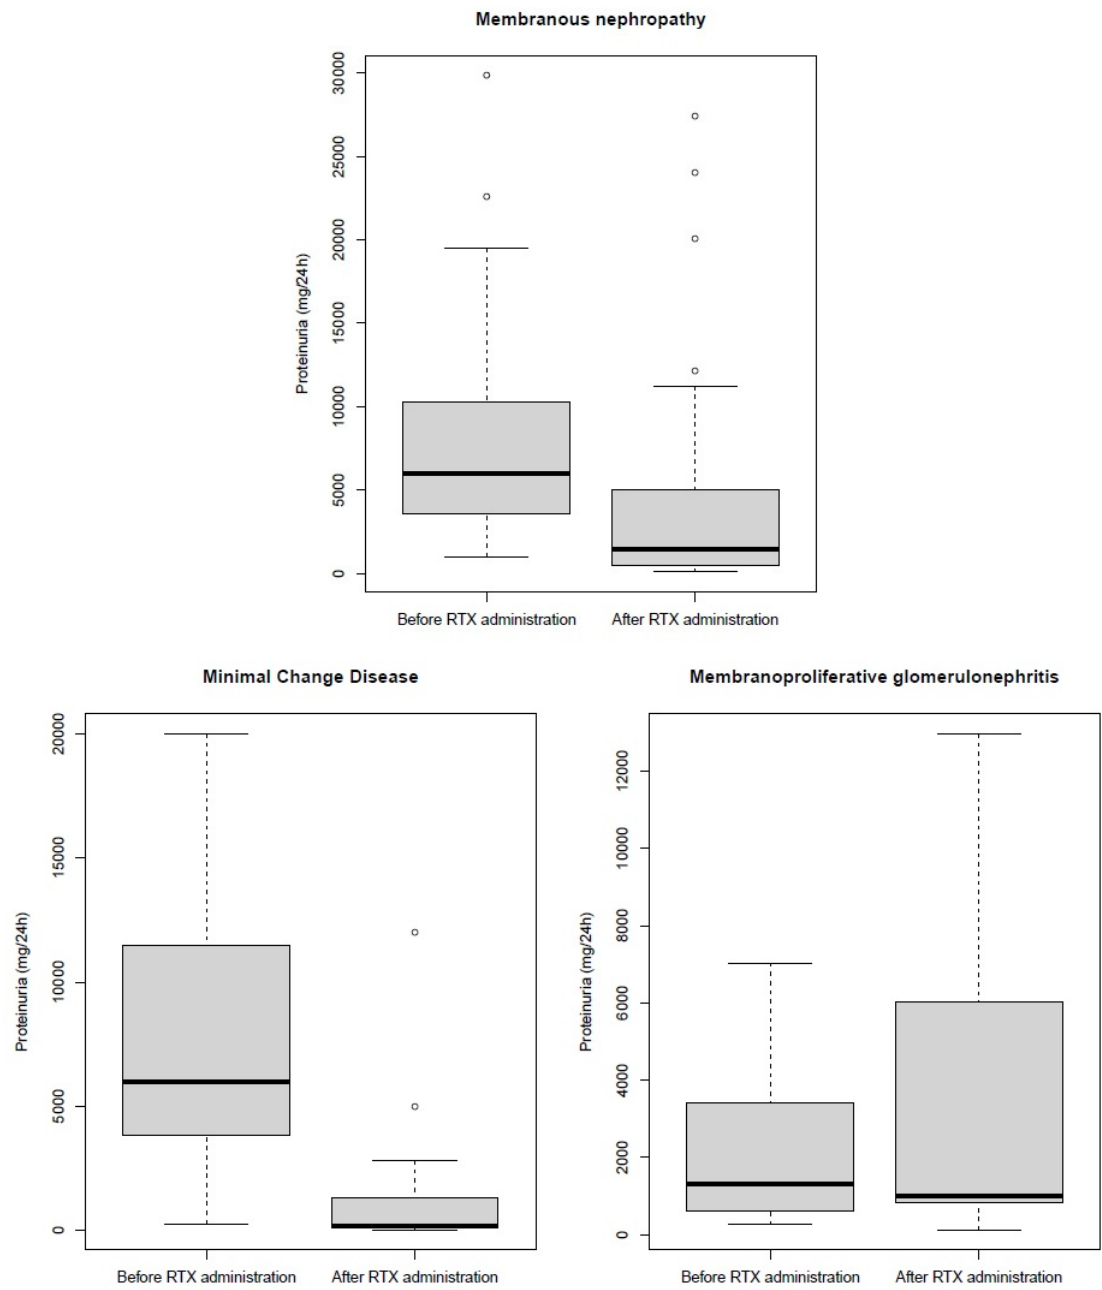

RTX: rituximab
